# Supplementary material for: Patient-derived xenograft (PDX) tumors increase growth rate with time
Source: PubMed Central journal article supplement (PMC4884970; doi:10.18632/oncotarget.6919), 2016-01-14
Supplement: oncotarget-07-7993-s001.pdf [file oncotarget-07-7993-s001.pdf]

# Patient-derived xenograft (PDX) tumors increase growth rate with time

## Supplementary Material

A

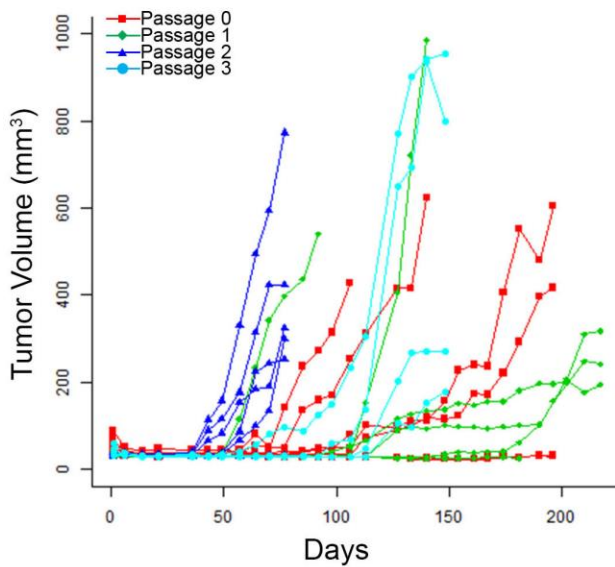

B

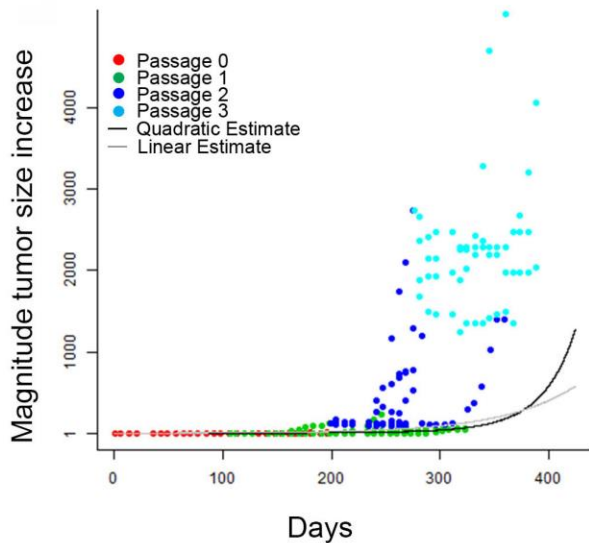

C

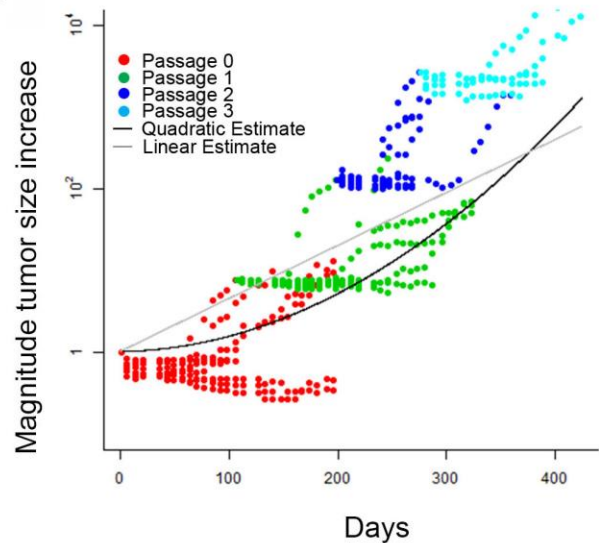

**Supplementary Figure 1:** A, PDX-SCC-M11 tumors were grown in SCID mice and tumor size data (mm<sup>3</sup>) was collected over time (days) for sequential passages (N=24). B and C, Relative tumor volume versus time for PDX-SCC-M11. Prediction lines for linear mixed models including

linear time model (grey) and quadratic time model (black) are superimposed. The data is expressed with untransformed axis (left column) and  $\log_{10}$ -axis (right column). A straight line in the right-hand graph represents a stable exponential growth rate.

**Supplementary Figure 2:** Patient characteristics of the PDX models evaluated here

|                                   | <b>PDX-SCC-M0</b>                 | <b>PDX-SCC-M1</b>                   | <b>PDX-SCC-M11</b>      | <b>UM-PDX-HACC-5</b>                    |
|-----------------------------------|-----------------------------------|-------------------------------------|-------------------------|-----------------------------------------|
| <b>Age at diagnosis</b>           | 58                                | 72                                  | 37                      | 45                                      |
| <b>Gender</b>                     | Male                              | Male                                | Male                    | Female                                  |
| <b>Histologic Subtype</b>         | Squamous cell carcinoma           | Squamous cell carcinoma             | Squamous cell carcinoma | Salivary gland adenoid cystic carcinoma |
| <b>Stage at PDX establishment</b> | T4aN0M0 (IVa)                     | T2N1M0 (III)                        | T4N0M0 (IV)             | T4aN0M0 (IVa)                           |
| <b>Perineural Invasion</b>        | Yes                               | No                                  | Unknown                 | Yes                                     |
| <b>Primary Site</b>               | Unknown                           | Oral tongue                         | Sinonasal               | Hard palate                             |
| <b>Site of Sample</b>             | Parotid gland                     | Oral tongue                         | Sinonasal               | Hard palate                             |
| <b>Pre-PDX Radiation</b>          | No                                | No                                  | Yes                     | No                                      |
| <b>Pre-PDX Chemotherapy</b>       | No                                | No                                  | Yes                     | No                                      |
| <b>Ablative Surgery</b>           | Parotidectomy and neck dissection | Hemiglossectomy and neck dissection | Skull base dissection   | Maxillectomy                            |
| <b>Post-PDX Recurrence</b>        | Yes                               | No                                  | Yes                     | No                                      |
| <b>Deceased</b>                   | No                                | No                                  | Yes                     | No                                      |

**Supplementary Figure 3:** Histopathological scoring of head and neck squamous cell carcinomas adapted from the Bryne classification (24)

| <b>Score Value</b>               | <b>1</b>                                       | <b>2</b>                                                          | <b>3</b>                                               | <b>4</b>                                                                       |
|----------------------------------|------------------------------------------------|-------------------------------------------------------------------|--------------------------------------------------------|--------------------------------------------------------------------------------|
| <b>Keratinization</b>            | Highly keratinized (>50% of cells)             | Moderately keratinized (20-50% of cells)                          | Minimal keratinization (5-20% of cells)                | No keratinization (0-5% of cells)                                              |
| <b>Nuclear pleomorphism</b>      | Little pleomorphism (>75% of mature cells)     | Moderately abundant nuclear pleomorphism (50-75% of mature cells) | Abundant nuclear pleomorphism (25-50% of mature cells) | Extreme nuclear pleomorphism (0-25% of mature cells)                           |
| <b>Pattern of invasion</b>       | Compressive, well delimited infiltrative edges | Infiltrative, solid cords, bands or lines                         | Small groups or cords of infiltrative cells (n>15)     | Remarkable and widespread dissociation in small groups and/or individual cells |
| <b>Inflammatory infiltration</b> | Remarkable                                     | Moderate                                                          | Little                                                 | Absent                                                                         |

**Supplementary Figure 4:** Genotypic analysis of DNA was extracted from unfrozen tissues of PDX models studied here

|                              | <b>Chromosome</b> | <b>Gene</b>           | <b>Nucleic Acid Change</b> | <b>Amino Acid Change</b>                        |
|------------------------------|-------------------|-----------------------|----------------------------|-------------------------------------------------|
| <b>PDX-SCC-M0, passage 0</b> | 14                | AKT1                  | G→T                        | C138A:p.D46E                                    |
| <b>PDX-SCC-M0, Passage 5</b> | 14                | AKT1                  | G→T                        | C138A:p.D46E                                    |
| <b>PDX-SCC-M1, passage 0</b> | 4<br>17<br>20     | FGFR3<br>TP53<br>GNAS | C→G<br>G→C<br>C→T          | C1149G:p.F383L<br>C192G:p.Y64X<br>C556T:p.R186C |
| <b>PDX-SCC-M1, passage 2</b> | 4<br>17<br>20     | FGFR3<br>TP53<br>GNAS | C→G<br>G→C<br>C→T          | C1149G:p.F383L<br>C192G:p.Y64X<br>C556T:p.R186C |

**Supplementary Figure 5:** Histopathological scoring of adenoid cystic carcinomas based on a classification adapted from Seethala and colleagues (26).

| <b>Histopathological Score Value</b> | <b>1</b> | <b>2</b>   | <b>3</b> |
|--------------------------------------|----------|------------|----------|
| <b>Pattern</b>                       | Tubular  | Cribriform | Solid    |

| <b>High Grade Transformation Score Value</b> | <b>1</b>                  | <b>2</b>                          |
|----------------------------------------------|---------------------------|-----------------------------------|
| <b>Nucleoli</b>                              | Tubular                   | Cribriform                        |
| <b>Chromatin</b>                             | Present but indistinct    | Prominent                         |
| <b>Nuclear size</b>                          | Uniform size distribution | At least 2-fold nuclear variation |
| <b>Cytoplasm</b>                             | Scant to nearly absent    | Scant to moderate                 |
| <b>Overall pleomorphism</b>                  | Low                       | High                              |
